# Supplementary material for: Mutations, Genes, and Phenotypes Related to Movement Disorders and Ataxias
Source: MDPI journal article supplement (doi:10.3390/ijms231911847), 2022-10-06
Supplement: s1 [file s1]

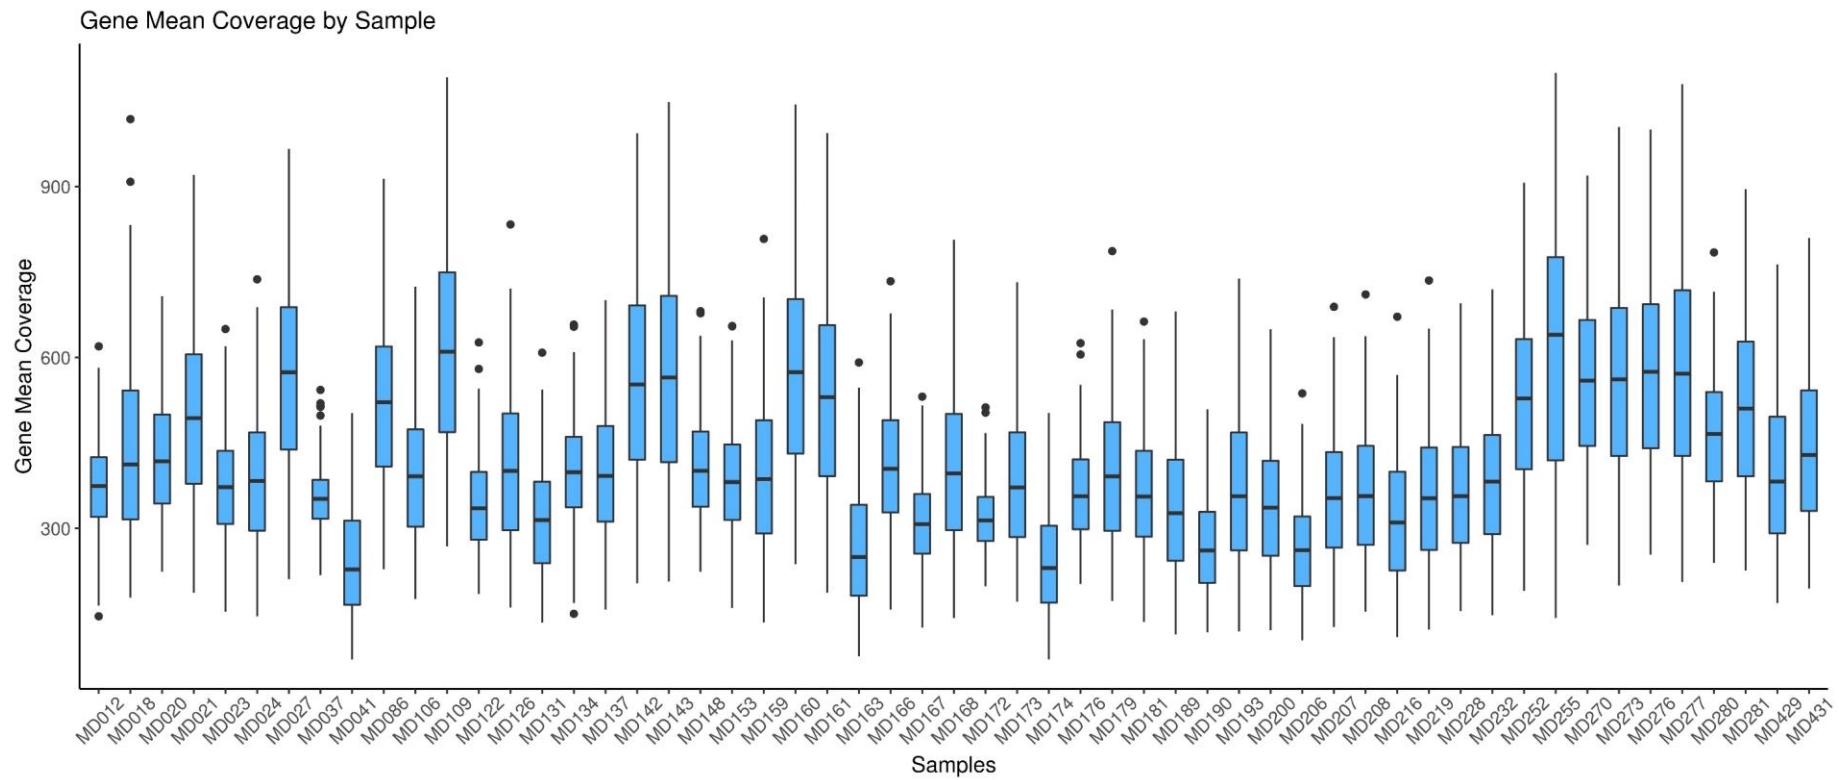

**Supplementary Figure S1.** Depth of coverage of each of the 55 samples analysed using the custom gene panel MovDisord.

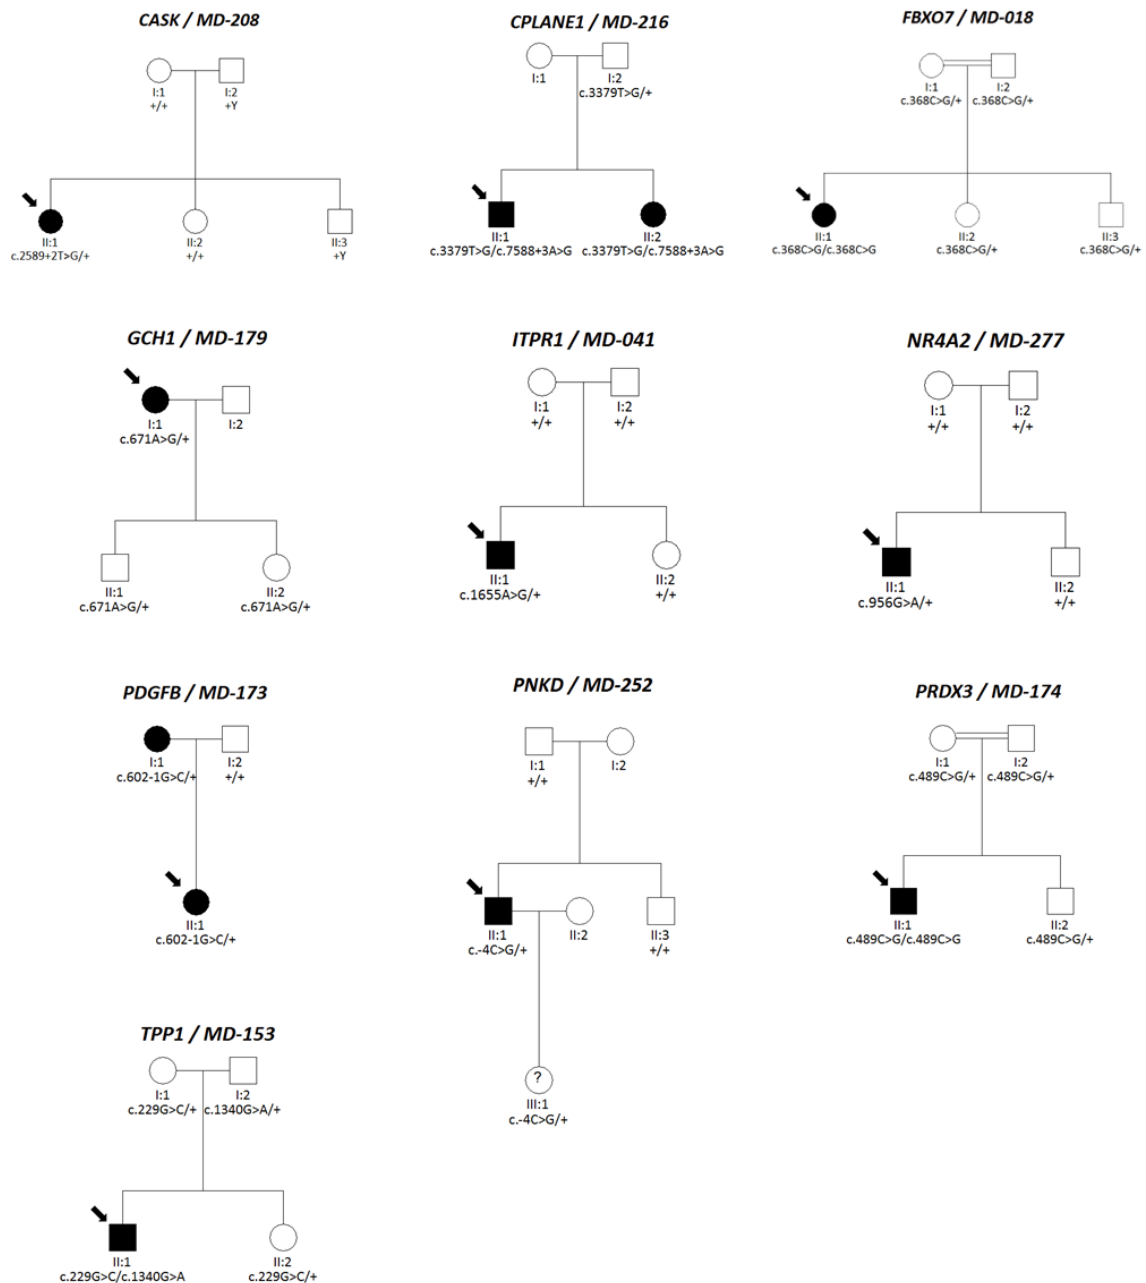

**Supplementary Figure S2.** Segregation analysis of disease-causing mutations. Only families for which DNA was available from parents and other relatives are included. At the top of each pedigree, the responsible gene and the proband's code are indicated. The arrow points out the proband. Genotypes for each deleterious variant are shown below each symbol/subject; those individuals without genotype were not investigated because DNA was not available. Plus (+) symbol refers to the absence of the causative changes. A question mark (?) on the MD-252's daughter (*PNKD*) means that this girl (25 years old) is currently asymptomatic. All the implicated genes are located in autosomes, except *CASK* that is located on chromosome X. MD-018 (*FBXO7*) and MD-174 (*PRDX3*) were born to consanguineous parents.

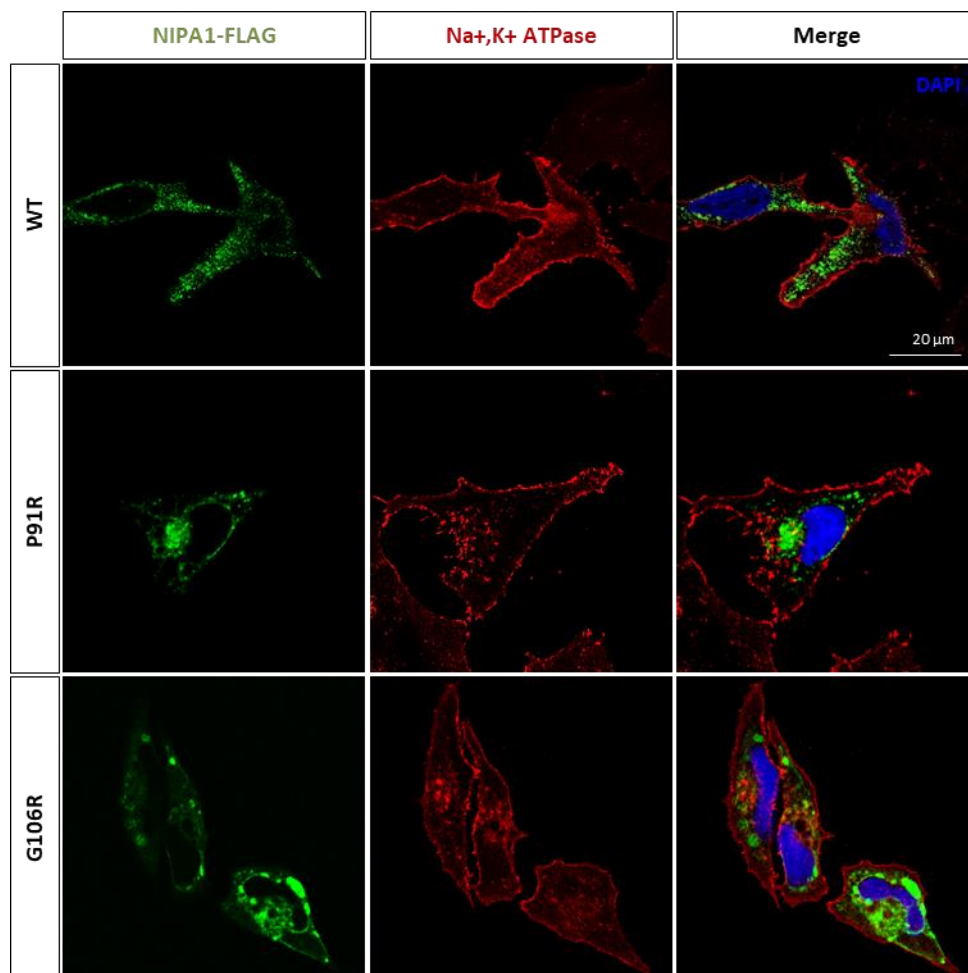

**Supplementary Figure S3.** Intracellular distribution of transiently expressed wild-type (WT) NIPA1 protein and two NIPA1 mutated forms: p.P91R identified in patient MD-232 and the recurrent clinical mutation p.G106R. HeLa cells were transfected with NIPA1 constructs, tagged with FLAG in C-ter, for 24 hours and subsequently fixed and immunostained using anti-FLAG antibody (green), anti-sodium potassium ATPase (Na<sup>+</sup>,K<sup>+</sup> ATPase) antibody (red) as a marker of plasma membrane, and DAPI (blue). Representative confocal microscopy images are shown. WT-NIPA1 displays a diffuse cytoplasmatic pattern extended to the cell surface; minimal or no co-localization with Na<sup>+</sup>, K<sup>+</sup> ATPase is detected. In contrast, NIPA1-P91R predominantly shows perinuclear distribution and sporadically localizes in larger vesicle-like structures, while NIPA1-G106R is accumulated in large aggregates, as previously described.

**Supplementary Table S1.** Haplotype constructed for the *PANK2* locus in twelve unrelated carriers of the c.1583C>T (rs137852967) mutation.

| PANK2 gene  |         |                          |           |         |           |             |           |           |         |         |           |
|-------------|---------|--------------------------|-----------|---------|-----------|-------------|-----------|-----------|---------|---------|-----------|
| Patients ID | Origin  | PANK2<br>c.1583C>T       | rs1078152 | D20S867 | rs6084513 | rs137852967 | rs6037695 | rs7270329 | D20S889 | D20S116 | rs1628323 |
| MD-002      | Spain   | HOMOZYGOSIS<br>Roma      | A         | 268     | C         | T           | C         | G         | 285     | 115     | T         |
|             |         |                          | A         | 268     | C         | T           | C         | G         | 285     | 119     | T         |
| MD-004      |         |                          | A         | 268     | C         | T           | C         | G         | 285     | 115     | T         |
|             |         |                          | A         | 268     | C         | T           | C         | G         | 285     | 119     | T         |
| MD-007      |         |                          | A         | 268     | C         | T           | C         | G         | 285     | 115     | T         |
|             |         |                          | A         | 268     | C         | T           | C         | G         | 285     | 119     | T         |
| MD-008      |         |                          | A         | 268     | C         | T           | C         | G         | 285     | 115     | T         |
|             |         |                          | A         | 268     | C         | T           | C         | G         | 285     | 119     | T         |
| MD-040      |         |                          | A         | 268     | C         | T           | C         | G         | 285     | 115     | T         |
|             |         |                          | A         | 268     | C         | T           | C         | G         | 285     | 119     | T         |
| MD-101      |         |                          | A         | 268     | C         | T           | C         | G         | 285     | 115     | T         |
|             |         |                          | A         | 268     | C         | T           | C         | G         | 285     | 119     | T         |
| MD-132      |         |                          | A         | 268     | C         | T           | C         | G         | 285     | 115     | T         |
|             |         |                          | A         | 268     | C         | T           | C         | G         | 285     | 119     | T         |
| MD-046      | Hungary | C                        | 268       | C       | T         | C           | G         | 285       | 115     | T       |           |
|             |         | C                        | 271       | C       | T         | C           | G         | 289       | 119     | T       |           |
| MD-114      | Greece  | HETEROZYGOUS<br>Non-Roma | A         | 268     | C         | T           | C         | G         | 285     | 115     | T         |
|             |         |                          | A         | 270     | C         | C           | C         | G         | 287     | 109     | C         |
| MD-115      |         |                          | A         | 268     | C         | T           | C         | G         | 285     | 115     | T         |
|             |         |                          | A         | 270     | C         | C           | C         | G         | 287     | 109     | C         |
| MD-112      |         |                          | A         | 268     | C         | T           | C         | G         | 278     | 103     | C         |
|             |         |                          | A         | 270     | C         | C           | C         | G         | 281     | 103     | C         |
| MD-102      | Spain   |                          | A         | 268     | A         | T           | C         | 270       | 109     | C       |           |
|             |         |                          | A         | 272     | A         | C           | T         | C         | 268     | 103     | C         |

**Supplementary Table S2.** Sequencing coverage summary for the 55 samples investigated with the custom gene panel MovDisord.

| Patient | Mean Coverage | % Bases |      |      |      |      |      |      |      |
|---------|---------------|---------|------|------|------|------|------|------|------|
|         |               | >1      | >10  | >15  | >20  | >50  | >100 | >150 | >200 |
| MD-012  | 369.93        | 100     | 100  | 100  | 99.9 | 99.7 | 98.7 | 95.9 | 90   |
| MD-018  | 424.68        | 100     | 100  | 100  | 100  | 99.7 | 98.6 | 95.7 | 89.5 |
| MD-020  | 417.2         | 100     | 100  | 100  | 100  | 99.7 | 98.8 | 96.5 | 91.6 |
| MD-021  | 493.46        | 100     | 100  | 100  | 100  | 99.8 | 98.9 | 97.1 | 93.4 |
| MD-023  | 368.66        | 100     | 100  | 100  | 99.9 | 99.7 | 98.5 | 95.2 | 88.6 |
| MD-024  | 379.66        | 100     | 100  | 100  | 100  | 99.6 | 97.6 | 93   | 85.4 |
| MD-027  | 568.79        | 100     | 100  | 100  | 100  | 99.8 | 99.3 | 98.1 | 95.9 |
| MD-037  | 353.92        | 100     | 100  | 100  | 99.9 | 99.7 | 98.8 | 96.7 | 91.5 |
| MD-041  | 233.64        | 100     | 99.9 | 99.8 | 99.7 | 97.2 | 86   | 70.7 | 55.2 |
| MD-086  | 516.01        | 100     | 100  | 100  | 100  | 99.8 | 99   | 97.2 | 94.2 |
| MD-106  | 386.23        | 100     | 100  | 100  | 100  | 99.7 | 98   | 93.9 | 86.9 |
| MD-109  | 605.06        | 100     | 100  | 100  | 100  | 99.8 | 99.3 | 98   | 95.8 |
| MD-122  | 335.85        | 100     | 100  | 100  | 99.9 | 99.6 | 98.3 | 94   | 84.9 |
| MD-126  | 397.78        | 100     | 100  | 100  | 99.9 | 99.6 | 97.5 | 92.8 | 85.6 |
| MD-131  | 310.47        | 100     | 100  | 100  | 99.9 | 99.3 | 95.8 | 88.1 | 76.9 |
| MD-134  | 395.8         | 100     | 100  | 100  | 99.9 | 99.7 | 98.8 | 96.4 | 91.3 |
| MD-137  | 390.44        | 100     | 100  | 100  | 100  | 99.8 | 98.5 | 95.2 | 88.6 |
| MD-142  | 554.74        | 100     | 100  | 100  | 100  | 99.8 | 99.1 | 97.6 | 94.9 |
| MD-143  | 560.46        | 100     | 100  | 100  | 100  | 99.8 | 99.1 | 97.5 | 94.6 |
| MD-148  | 400.55        | 100     | 100  | 100  | 100  | 99.8 | 99   | 96.9 | 92.2 |
| MD-153  | 376.61        | 100     | 100  | 100  | 100  | 99.8 | 98.7 | 95.7 | 89.6 |
| MD-159  | 386.92        | 100     | 100  | 100  | 100  | 99.5 | 97.2 | 92.1 | 84.1 |
| MD-160  | 564.34        | 100     | 100  | 100  | 100  | 99.8 | 99.1 | 97.4 | 94.5 |
| MD-161  | 527.56        | 100     | 100  | 100  | 100  | 99.8 | 98.8 | 96.7 | 93.1 |
| MD-163  | 257.78        | 100     | 99.9 | 99.8 | 99.7 | 97.9 | 88.9 | 75.5 | 60.9 |
| MD-166  | 403.67        | 100     | 100  | 100  | 100  | 99.8 | 98.7 | 96   | 90.5 |
| MD-167  | 306.19        | 100     | 100  | 100  | 100  | 99.6 | 97.7 | 91.9 | 80.8 |
| MD-168  | 393.89        | 100     | 100  | 100  | 100  | 99.6 | 97.4 | 92.7 | 85.2 |
| MD-172  | 316.42        | 100     | 100  | 100  | 100  | 99.7 | 98.7 | 95.2 | 86.6 |
| MD-173  | 370.92        | 100     | 100  | 100  | 100  | 99.7 | 98.1 | 93.6 | 85.2 |
| MD-174  | 233.33        | 100     | 99.9 | 99.9 | 99.7 | 97.8 | 88   | 72.6 | 56.5 |
| MD-176  | 356.49        | 100     | 100  | 100  | 100  | 99.7 | 98.6 | 95.2 | 88   |
| MD-179  | 388.04        | 100     | 100  | 100  | 99.9 | 99.6 | 97.6 | 93   | 85.5 |
| MD-181  | 354.44        | 100     | 100  | 100  | 100  | 99.7 | 98.1 | 93.6 | 85.2 |
| MD-189  | 329.95        | 100     | 100  | 100  | 99.9 | 99.3 | 95.7 | 87.8 | 77.3 |
| MD-190  | 261.91        | 100     | 100  | 99.9 | 99.9 | 99   | 93.4 | 81.6 | 66.8 |
| MD-193  | 359.08        | 100     | 100  | 100  | 99.9 | 99.2 | 95.7 | 88.5 | 79.1 |
| MD-200  | 331.37        | 100     | 100  | 100  | 99.9 | 99.3 | 96   | 88.6 | 78.3 |
| MD-206  | 259           | 100     | 100  | 99.9 | 99.8 | 98.6 | 91.9 | 79.9 | 65.1 |
| MD-207  | 348.49        | 100     | 100  | 100  | 99.9 | 99.4 | 96.6 | 90.2 | 81   |
| MD-208  | 354.47        | 100     | 100  | 100  | 100  | 99.5 | 97.1 | 91.3 | 82.4 |
| MD-216  | 310.6         | 100     | 100  | 99.9 | 99.9 | 98.9 | 94.1 | 84.8 | 73.4 |
| MD-219  | 350.26        | 100     | 100  | 99.9 | 99.9 | 99.3 | 96.2 | 89.3 | 80   |
| MD-228  | 355.98        | 100     | 100  | 100  | 100  | 99.5 | 97.1 | 91.3 | 82.7 |
| MD-232  | 375.09        | 100     | 100  | 100  | 100  | 99.6 | 97.4 | 92.6 | 84.6 |
| MD-252  | 517.62        | 100     | 100  | 100  | 100  | 99.7 | 98.8 | 96.9 | 93.8 |
| MD-255  | 592.28        | 100     | 100  | 99.9 | 99.9 | 98.9 | 95.6 | 91.4 | 86.7 |
| MD-270  | 557.4         | 100     | 100  | 100  | 100  | 99.8 | 99.3 | 98   | 95.7 |
| MD-273  | 559.72        | 100     | 100  | 100  | 100  | 99.8 | 99.2 | 97.7 | 95.1 |
| MD-276  | 567.85        | 100     | 100  | 100  | 100  | 99.8 | 99.1 | 97.7 | 95   |
| MD-277  | 572.34        | 100     | 100  | 100  | 100  | 99.8 | 99.1 | 97.5 | 94.7 |
| MD-280  | 465.06        | 100     | 100  | 100  | 100  | 99.8 | 99.2 | 97.6 | 94.4 |
| MD-281  | 509.95        | 100     | 100  | 100  | 100  | 99.8 | 99   | 97.1 | 93.7 |
| MD-429  | 391.91        | 100     | 100  | 100  | 100  | 99.6 | 97.6 | 92.9 | 85.4 |
| MD-431  | 435.52        | 100     | 100  | 100  | 100  | 99.8 | 98.5 | 95.4 | 89.9 |

**Supplementary Table S3.** Genes included in the last version of the custom panel MovDisord.

| CLINICAL<br>SIGN<br>(no. genes) | 517 GENES                                                                                                                                                                                                                                                                                                                                                                                                                                                                                                                                                                                                                                                                                                                                                                                                                                                                                                                                                                                                                                                                                                                                                                                                                                                                                                                                                                                                                                                                                                                                                          |
|---------------------------------|--------------------------------------------------------------------------------------------------------------------------------------------------------------------------------------------------------------------------------------------------------------------------------------------------------------------------------------------------------------------------------------------------------------------------------------------------------------------------------------------------------------------------------------------------------------------------------------------------------------------------------------------------------------------------------------------------------------------------------------------------------------------------------------------------------------------------------------------------------------------------------------------------------------------------------------------------------------------------------------------------------------------------------------------------------------------------------------------------------------------------------------------------------------------------------------------------------------------------------------------------------------------------------------------------------------------------------------------------------------------------------------------------------------------------------------------------------------------------------------------------------------------------------------------------------------------|
| Ataxia (210)                    | <i>ABCB7, ACO2, ADCK3, AH11, ALG6, AMACR, ANO10, APTX, ARL13B, ARSA, ATCAY, ATG5, ATM, ATP1A3, ATP2B3, ATP7A, ATP8A2, ATR, ATXN2, BCKDHA, BCKDHB, BTB, C10ORF2, C5ORF42, CACNA1G, CACNB4, CAMTA1, CASK, CC2D2A, CCDC88C, CEP290, CEP41, CHMP1A, CHP1, CLCN2, CLN5, CLN6, CLP1, COG5, COL18A1, COQ2, COQ4, COQ5, COQ7, COQ9, COX20, CSTB, CTDPI, CTSD, CUL4B, CWF19L1, DAB1, DBT, DCLRE1B, DHTKD1, DKC1, DNAJC19, DNMT1, DYRK1A, EEF2, EIF2B1, EIF2B2, EIF2B3, EIF2B4, EIF2B5, ELOVL4, ELOVL5, EMC1, EP300, EPM2A, ERCC2, ERCC3, ERCC5, ERCC6, ERCC8, EXOSC3, EXOSC8, FAAH2, FAT1, FAT2, FGF14, FLVCR1, FOLR1, FOXCI, GAN, GOSR2, GPR56, GRM1, HEXA, HSD17B4, IFRD1, INPP5E, ITPR1, KCNA1, KCNA2, KCNC3, KCND3, KCNJ10, KCTD7, KDM6A, KIAA0226, KIF26B, KIF7, KMT2D, L2HGDH, LAMA1, LMNB2, MAN2B1, MCEE, MLC1, MMACHC, MMADHC, MORC2, MRE11A, MRPL10, MTFMT, MTPP, NALCN, NHLRC1, NKX2-1, NKX6-2, NOL3, NPC1, OFD1, OPHN1, PARN, PAX6, PC, PCNA, PDHB, PDSS1, PDSS2, PEX10, PEX6, PEX7, PHYH, PIK3R5, PITRM1, PITX2, PLD3, PLP1, PMPCA, PNKP, POLG2, POLR3B, PRICKLE1, PRKCG, PRPS1, PTEN, PUM1, RAD1, RARS2, RIPPLY1, RPGRIPI1, RTEL1, SAMD9L, SCARB2, SCN1A, SCN2A, SCN8A, SCYL1, SEPSECS, SETX, SLC17A5, SLC1A3, SLC25A46, SLC2A1, SLC46A1, SLC52A2, SLC52A3, SLC6A19, SLC9A1, SLC9A6, SNAP25, SNX14, SPTAN1, SPTBN2, SURF1, SYNE1, SYT14, TCTN1, TCTN2, TCTN3, TDP2, TERT, TGFB1, TGM6, THG1L, TNF2, TMEM138, TMEM216, TMEM231, TMEM237, TMEM240, TMEM67, TRAPPC11, TRPC3, TSEN2, TSEN54, TTBK2, TTPA, TTR, UBA5, VHL, VLDLR, VPS53, VRK1, WFS1, XPA, XRCC1</i> |
| SPAX (41)                       | <i>AARS2, ABHD12, AFG3L2, AIMP1, ARX, CA8, CYP27A1, DARS2, ERLIN1, FAM126A, FXN, GALC, GBA2, GFAP, GJC2, GRID2, KIF1C, LICAM, LMNB1, LYST, MAG, MARS2, MECP2, MTPAP, OPA1, OPA3, PDYN, PNPLA6, POLR3A, RARS, RPIA, SACS, SIL1, SPG7, STUB1, TPP1, TTC19, VAMP1, VWA3B, WDR73, WWOX</i>                                                                                                                                                                                                                                                                                                                                                                                                                                                                                                                                                                                                                                                                                                                                                                                                                                                                                                                                                                                                                                                                                                                                                                                                                                                                             |
| SPG (69)                        | <i>ALDH18A1, ALS2, AMPD2, AP4B1, AP4E1, AP4S1, AP5Z1, ARG1, ARL6IP1, ARSI, ATAD3A, ATL1, B4GALNT1, BICD2, BSCL2, C12ORF65, CAV1, CCT5, CHCHD10, CPT1C, CYP2U1, CYP7B1, DDHD1, DDHD2, DNM2, DSTYK, ENTPD1, EPT1, ERLIN2, FAM134B, FIG4, FLRT1, GAD1, GBE1, GRN, HACE1, HSPD1, IBA57, IFIH1, KIAA0196, KIF1A, KIF5A, KLC2, MARS, NIPA1, NT5C2, PEX16, PGAP1, RAB3GAP2, REEP1, REEP2, RTN2, SARS2, SLC16A2, SPAST, SPG11, SPG20, SPG21, TARDBP, TECPR2, TFG, TRMT5, UBQLN2, USP8, VPS37A, WDR48, ZFR, ZFYVE26, ZFYVE27</i>                                                                                                                                                                                                                                                                                                                                                                                                                                                                                                                                                                                                                                                                                                                                                                                                                                                                                                                                                                                                                                            |
| Dystonia (93)                   | <i>ACAT1, ANO3, ATP1A2, ATP7B, BCS1L, CACNA1B, CIZ1, COL6A3, COX10, COX15, COX8A, DDC, DLAT, DLD, DNAJC12, EARS2, ECHS1, ETHE1, FARS2, FBXL4, FOXG1, FOXRED1, GCDH, GCH1, GFM1, GFM2, GLB1, GNAL, GNAO1, GTPBP3, HIBCH, HPCA, HPRT1, IARS2, KCTD17, KMT2B, LIAS, LIPT1, LRPPRC, MCOLN1, MICU1, MUT, NARS2, NDUFA1, NDUFA10, NDUFA11, NDUFA12, NDUFA2, NDUFA4, NDUFA9, NDUFAF2, NDUFAF5, NDUFAF6, NDUFS1, NDUFS2, NDUFS3, NDUFS4, NDUFS7, NDUFS8, NDUFV1, NDUFV2, PCCA, PCCB, PDHX, PET100, PNPT1, PRKRA, PTS, QDPR, SCO2, SDHA, SDHAF1, SERAC1, SGCE, SLC19A3, SLC25A19, SLC30A10, SLC39A14, SLC6A3, SPR, SUCLA2, SUCLG1, TACO1, TH, THAP1, TIMM8A, TOR1A, TPK1, TRMU, TSFM, TUBB2B, TUBB4A, UQCRCQ</i>                                                                                                                                                                                                                                                                                                                                                                                                                                                                                                                                                                                                                                                                                                                                                                                                                                                            |
| Choreas (6)                     | <i>ADCY5, HTT, PRNP, RNF216, VPS13A, XK</i>                                                                                                                                                                                                                                                                                                                                                                                                                                                                                                                                                                                                                                                                                                                                                                                                                                                                                                                                                                                                                                                                                                                                                                                                                                                                                                                                                                                                                                                                                                                        |
| NBIA (14)                       | <i>AP4M1, ATP13A2, C19ORF12, COASY, CP, CRAT, DCAF17, FA2H, FTL, PANK2, PLA2G6, REPS1, SCP2, WDR45</i>                                                                                                                                                                                                                                                                                                                                                                                                                                                                                                                                                                                                                                                                                                                                                                                                                                                                                                                                                                                                                                                                                                                                                                                                                                                                                                                                                                                                                                                             |
| BGC (5)                         | <i>ISG15, PDGFB, PDGFRB, XPRI, SLC20A2</i>                                                                                                                                                                                                                                                                                                                                                                                                                                                                                                                                                                                                                                                                                                                                                                                                                                                                                                                                                                                                                                                                                                                                                                                                                                                                                                                                                                                                                                                                                                                         |
| Parkinson (14)                  | <i>CHCHD2, DNAJC13, DNAJC6, FBXO7, GBA, HTRA2, LRRK2, PARK2, PARK7, PINK1, POLG, SNCA, SYNJ1, VPS35</i>                                                                                                                                                                                                                                                                                                                                                                                                                                                                                                                                                                                                                                                                                                                                                                                                                                                                                                                                                                                                                                                                                                                                                                                                                                                                                                                                                                                                                                                            |
| Others (65)                     | <i>ACTB, ADAR, AIFM1, ALDH3A2, AMT, ASPA, ASS1, ATP6AP2, BCAP31, CACNA1A, CAPN1, DCTN1, ETFA, ETFB, ETFDH, FTH1, FUCA1, FUS, GAMT, GATM, GLDC, GLRX5, GTPBP2, HEXB, HTRA1, KIDINS220, KLC4, MECR, MTHFR, NPC2, NUP62, PCSK2, PDE10A, PDE8B, PDHA1, PMM2, PNKD, PPCDC, PPCS, PRRT2, PSEN1, RAB39B, RELN, RNASEH2A, RNASEH2B, RNASEH2C, RNF170, SAMHD1, SCN4A, SLC11A2, SLC25A15, SLC25A42, SLC40A1, SLC6A8, SMPD1, SQSTM1, SUOX, TENM4, TBCD, TBCE, TREX1, TXN2, UCHL1, VCP, WDR81</i>                                                                                                                                                                                                                                                                                                                                                                                                                                                                                                                                                                                                                                                                                                                                                                                                                                                                                                                                                                                                                                                                              |

SPAX: Spastic Ataxia; SPG: Spastic Paraplegia; NBIA: Neurodegeneration with Brain Iron Accumulation; BGC: Basal Ganglia Calcification
